# Supplementary material
Source: publisher figshare collection journal article supplement (https://acs.figshare.com/ndownloader/files/21855456)
Supplement: Supplementary file 1 [file 21855456]

# Supporting Information

## Investigation and control of charge transport anisotropy in highly oriented friction transferred polythiophene thin films

*Nikita Kumari<sup>†</sup>, Manish Pandey<sup>†\*</sup>, Shuichi Nagamatsu<sup>‡</sup>, Masakazu Nakamura<sup>‡</sup>, Shyam S. Pandey<sup>†\*</sup>*

<sup>†</sup>Graduate School of Life Science and Systems Engineering, Kyushu Institute of Technology, 2-4 Hibikino, Wakamatsu, Kitakyushu, 8080196 Japan

<sup>‡</sup> Laboratory for Organic Electronics, Division of Materials Science, Nara Institute of Science and Technology, 8916-5 Takayama-cho, Ikoma, Nara 630-0192, Japan

<sup>‡</sup>Department of Computer Science and Electronics, Kyushu Institute of Technology, 80-4 Kawazu, Iizuka, 820-8502 Japan

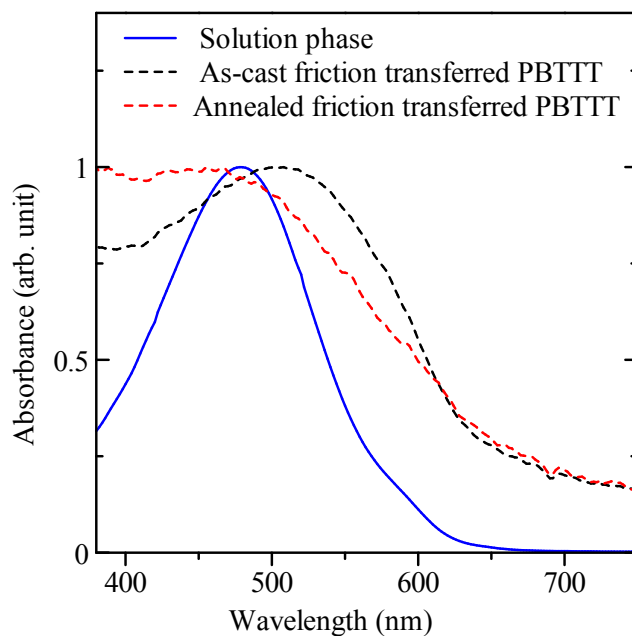

**Figure S1.** Normalized absorption spectra of different PBTTT samples, solution phase (dissolved in chlorobenzene) and friction transferred thin films as-cast and annealed at 180 °C. The spectra of solution-phase was measured with un-polarized light source and that of thin film was measured with orthogonally polarized light source.

**Table S1.** Some of the high optical anisotropy obtained for PBTTT through different casting techniques.

| Casting technique           | DR   | Reference |
|-----------------------------|------|-----------|
| Mechanical rubbing          | 13   | 1         |
| Compression on ionic liquid | 15.6 | 2         |
| Strain alignment            | ~ 9  | 3         |

|                        |                  |           |
|------------------------|------------------|-----------|
| Floating film transfer | up to 13         | 4         |
| Friction transfer      | $27.62 \pm 2.46$ | this work |

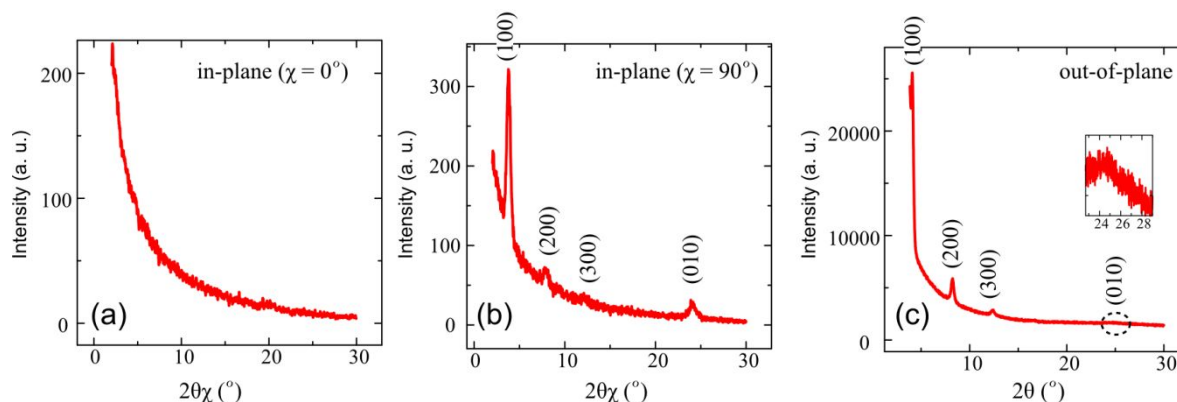

**Figure S2.** In-plane GIXD profile of friction transferred PBTtT film on bare oxide substrate and annealed at 200 °C for 10 minutes with incident X-ray beam parallel (a) and orthogonal to the drawing direction (b). Out-of-plane XRD pattern of the same film. Inset of (c) represents the magnified part of the graph circled with broken line. The scheme of measurement are shown in Figure 2 (a and b).

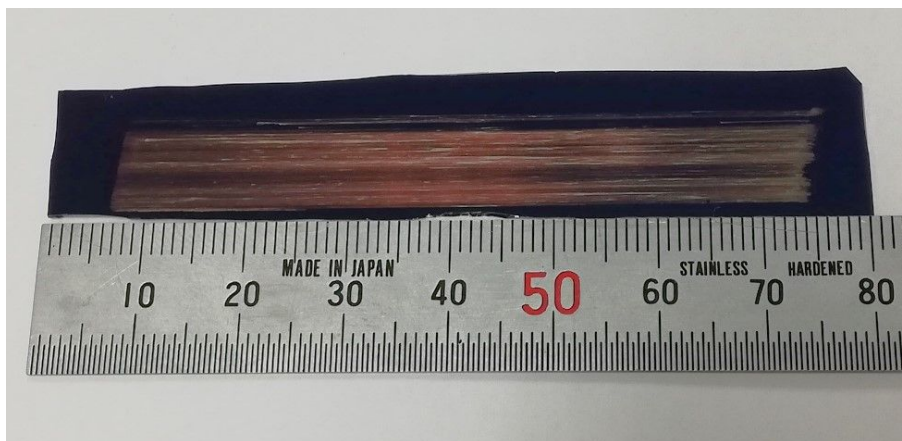

**Figure S3.** Digital image of the friction transferred PBTtT film on Si/SiO<sub>2</sub> substrate, to fabricate multiple OFETs on the same substrate.

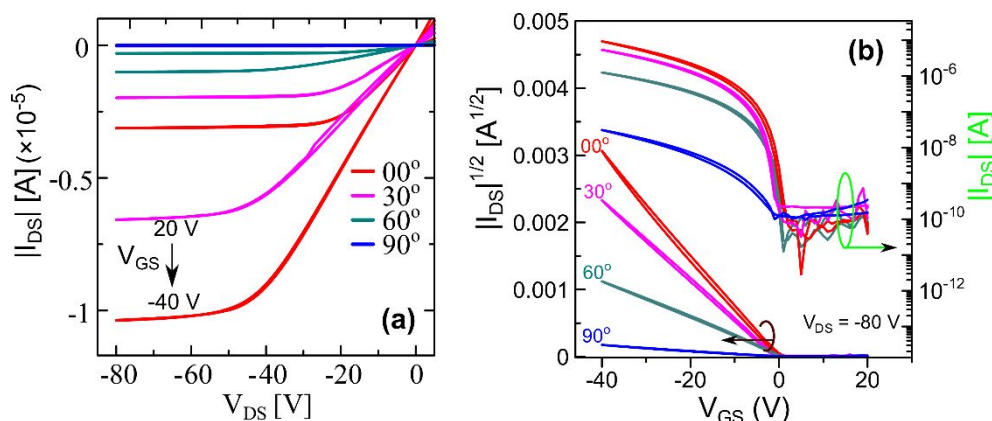

**Figure S4.** Output and (a) transfer (b) characteristics for the OFETs with varying channel direction with respect to the polymer back-bone orientation, the OFETs were fabricated with the friction transferred PBTTT on bare oxide surface films and annealed to 180 °C.

## AUTHOR INFORMATION

### Corresponding Author

Tel.: +81-93-695-6230. Fax: +81-93-695-6000

\*Shyam S. Pandey- Email: shyam@life.kyutech.ac.jp

\*Manish Pandey- Email: manish.iitp12@gmail.com

## Reference:

- (1) Biniek, L.; Leclerc, N.; Heiser, T.; Bechara, R.; Brinkmann, M. Large Scale Alignment and Charge Transport Anisotropy of PBTTT Films Oriented by High Temperature Rubbing. *Macromolecules* **2013**, *46* (10), 4014–4023.
- (2) Soeda, J.; Matsui, H.; Okamoto, T.; Osaka, I.; Takimiya, K.; Takeya, J. Highly Oriented Polymer Semiconductor Films Compressed at the Surface of Ionic Liquids for High-Performance Polymeric Organic Field-Effect Transistors. *Adv. Mater.* **2014**, *26* (37), 6430–6435.
- (3) Xue, X.; Chandler, G.; Zhang, X.; Kline, R. J.; Fei, Z.; Heeney, M.; Diemer, P. J.; Jurchescu, O. D.; O’connor, B. T. Oriented Liquid Crystalline Polymer Semiconductor Films with Large Ordered Domains. *ACS Appl. Mater. Interfaces* **2015**, *7* (48), 26726–26734.

- (4) Pandey, M.; Gowda, A.; Nagamatsu, S.; Kumar, S.; Takashima, W.; Hayase, S.; Pandey, S. S. Rapid Formation and Macroscopic Self-Assembly of Liquid-Crystalline, High-Mobility, Semiconducting Thienothiophene. *Adv. Mater. Interfaces* **2018**, 5 (6), 1700875.
